# Supplementary material for: Unexpectedly high dimethyl sulfide concentration in high-latitude Arctic sea ice melt ponds
Source: Royal Society of Chemistry journal article supplement (doi:10.1039/c9em00195f), 2019-01-01
Supplement: c9em00195f1.pdf [file c9em00195f1.pdf]

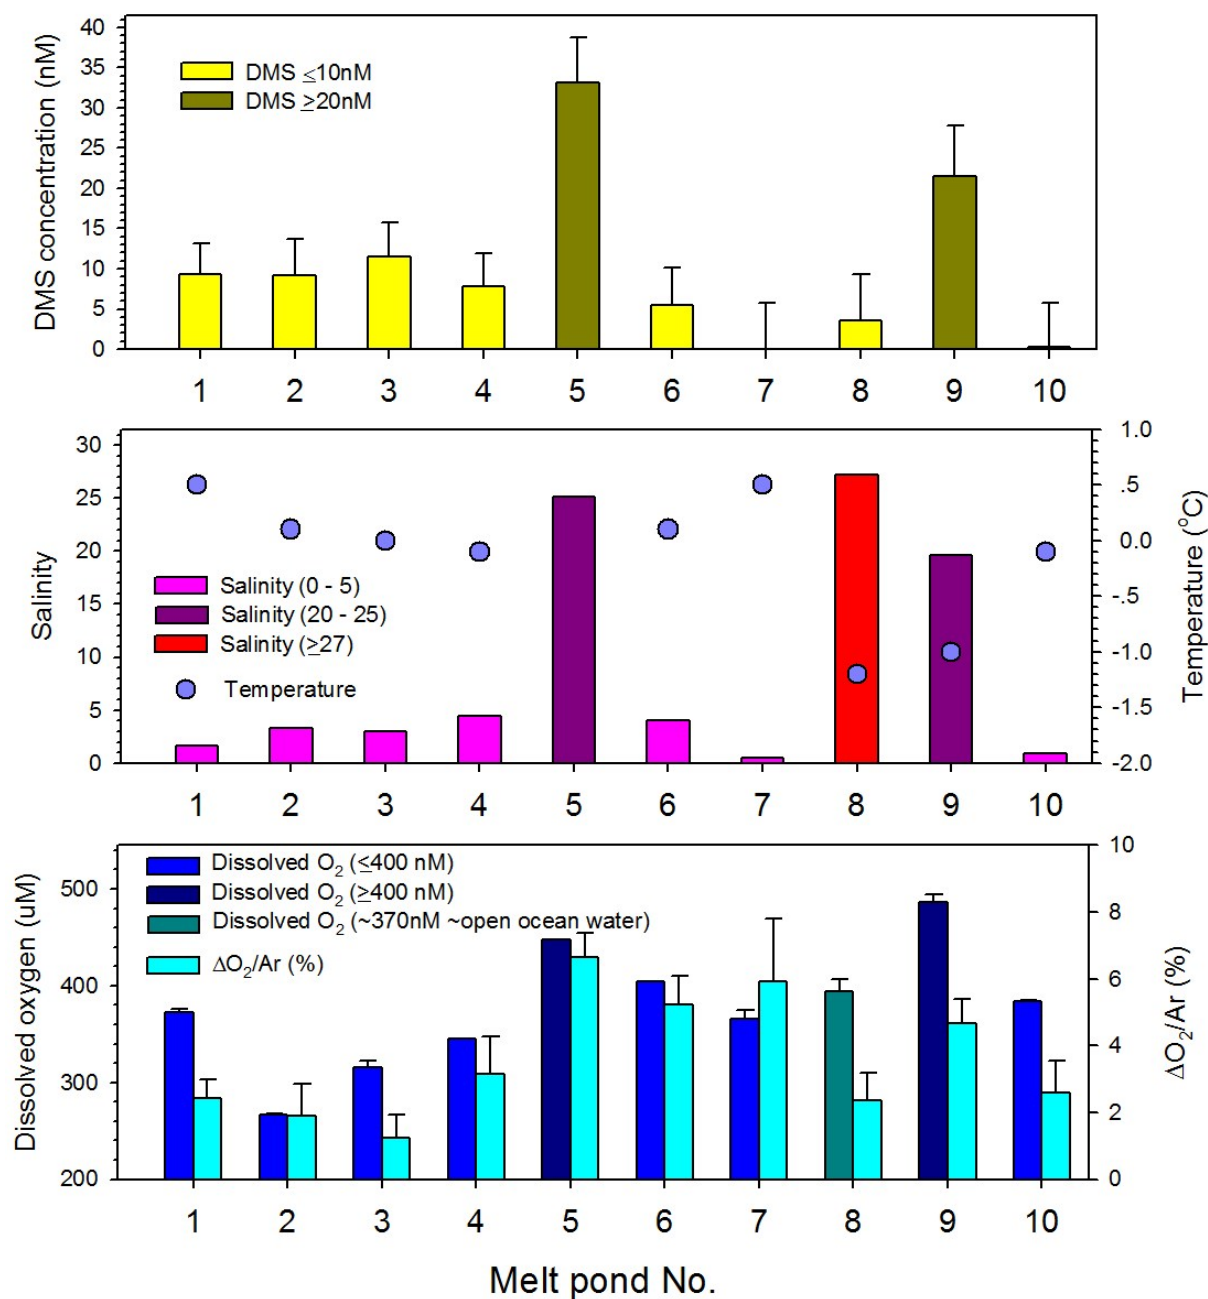

**Supplementary Figure 1.** Chemical and physical properties of each melt pond (\*which is visualizing the data of Table 1)

ARA07B (2016 Arctic cruise)

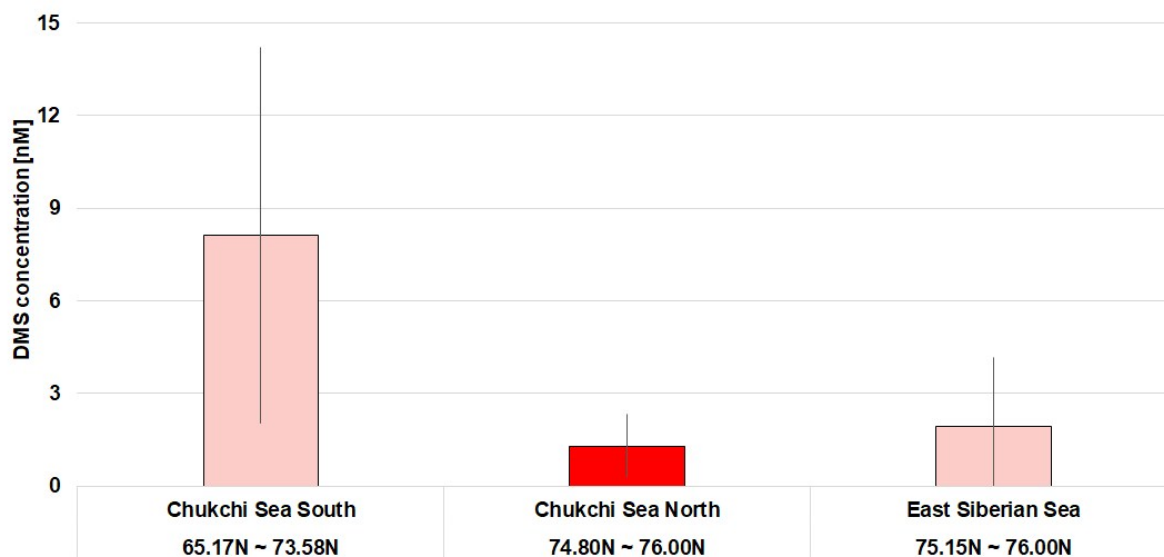

**Supplementary Figure 2.** Average DMS concentration in the surface water from underway measurements during Arctic cruise track in this study (Cruise tracks were shown in Figure 1). error bar indicate the 1- $\sigma$  uncertainty.
